# Supplementary material for: Boosting oxygen evolution with electrodes composed of metal sulfides and hydrogen bonded organic frameworks
Source: Royal Society of Chemistry journal article supplement (doi:10.1039/d4se00541d), 2024-01-01
Supplement: d4se00541d1.pdf [file d4se00541d1.pdf]

## **Supporting Information**

### **Boosting oxygen evolution with electrodes composed of metal sulfides and hydrogen bonded organic frameworks**

Hina Naz<sup>a,1</sup>, Rai Nauman Ali<sup>b,1</sup>, Waqar Ahmed Qureshi<sup>b</sup>, Amjad Ali<sup>b</sup>, Nyaaba Akeno

Albert<sup>a</sup>, Guoxing Zhu<sup>a,c,\*</sup>

*<sup>a</sup> School of Chemistry and Chemical Engineering, Jiangsu University, Zhenjiang,  
Jiangsu, 212013, PR China*

*<sup>b</sup> School of Materials Science and Engineering, Jiangsu University, Zhenjiang,  
Jiangsu, 212013, PR China*

*<sup>c</sup> Key Laboratory of Advanced Electrode Materials for Novel Solar Cells for  
Petroleum and Chemical Industry of China, School of Chemistry and Life Sciences,  
Suzhou University of Science and Technology, Suzhou City, Jiangsu Province 215009  
(P. R. China)*

*\*Corresponding Authors*

[zhuguoxing@ujs.edu.cn](mailto:zhuguoxing@ujs.edu.cn)

<sup>1</sup>Authors contributed equally.

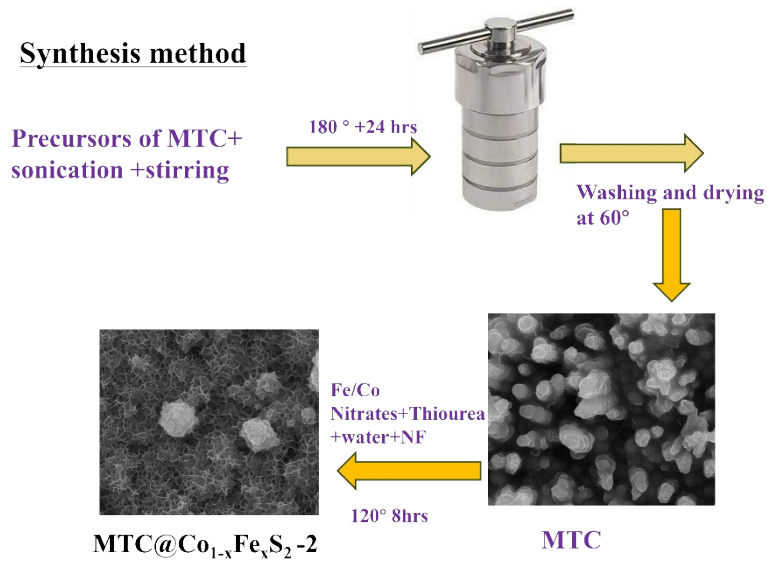

Figure S1: Schematic illustration of formation of MTC@Co<sub>1-x</sub>Fe<sub>x</sub>S<sub>2</sub>-2

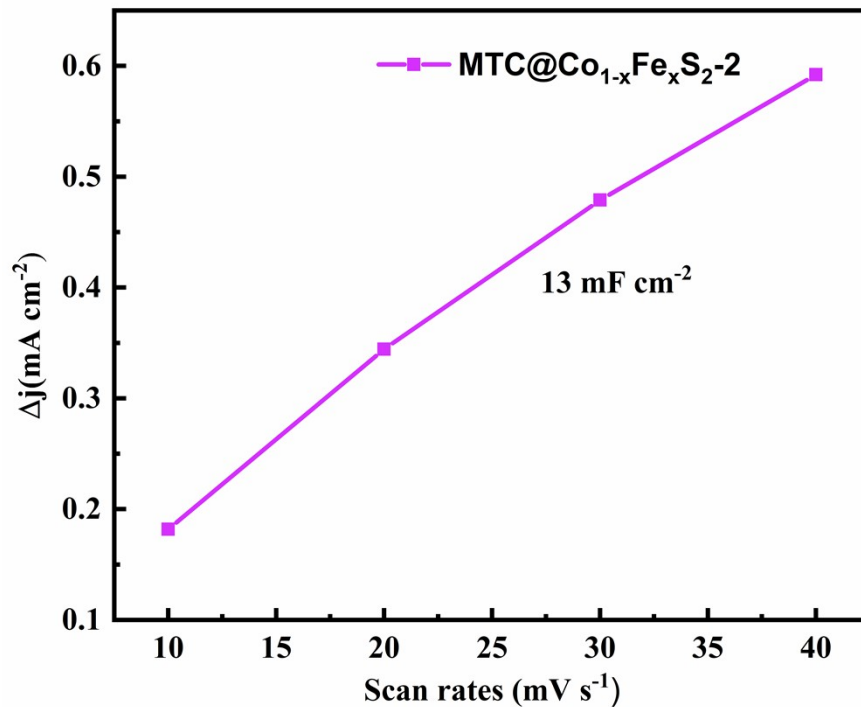

Figure S2: Estimation of double-layer capacitance ( $C_{dl}$ ) of MTC@Co<sub>1-x</sub>Fe<sub>x</sub>S<sub>2</sub>-2.

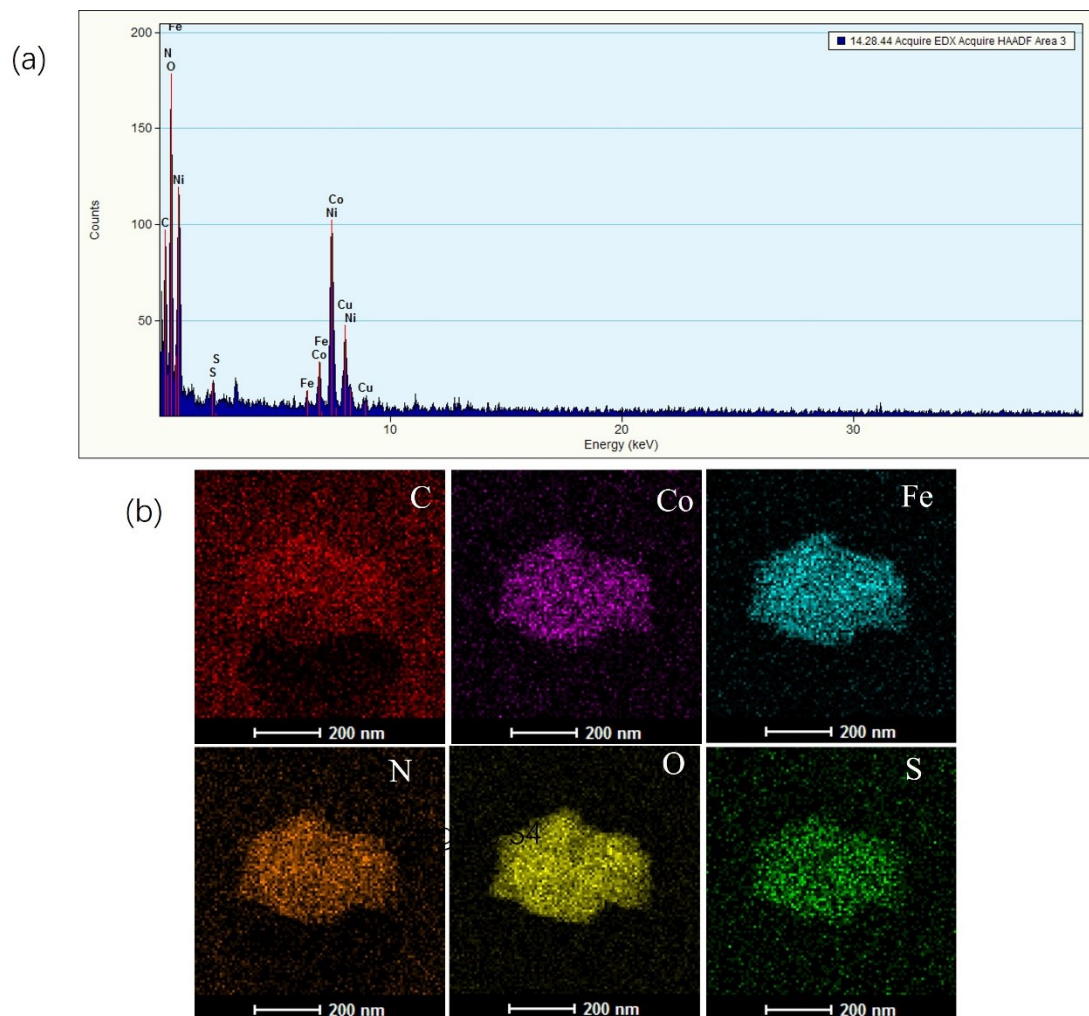

Figure S3. (a) EDS spectrum of  $MTC@Co_{1-x}Fe_xS_2-2$  (b) The corresponding elemental mapping images of C, Co, Fe, N, O, and S.

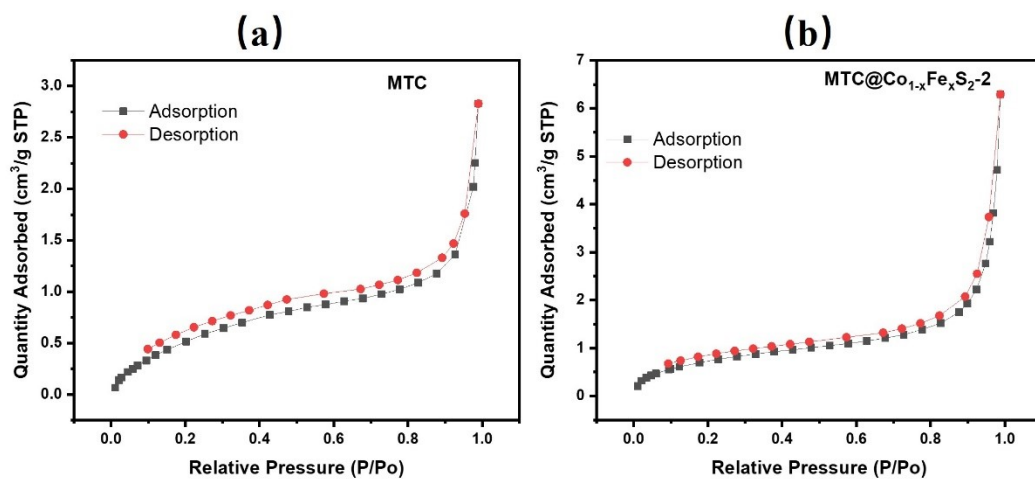

Figure S4: BET plots for (a) MTC (b) MTC@Co<sub>1-x</sub>Fe<sub>x</sub>S<sub>2</sub>-2

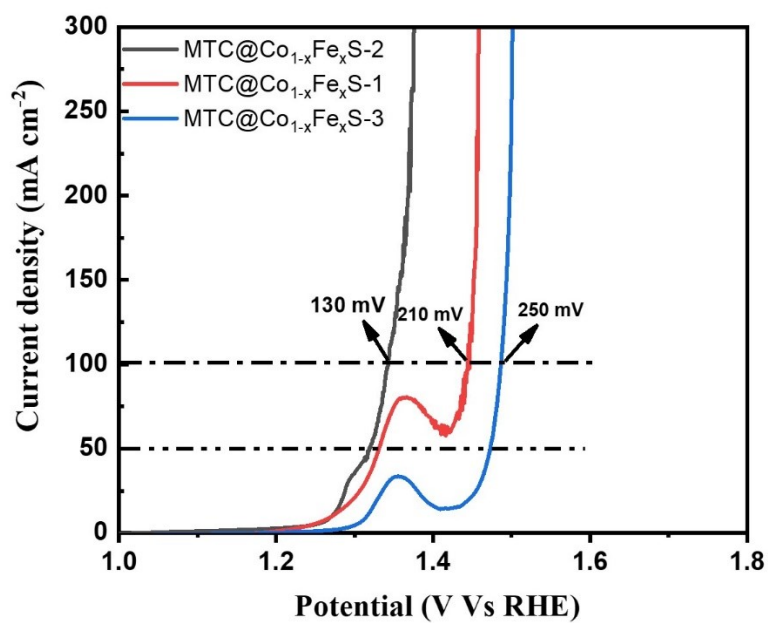

Figure S5: Polarization curves at scan rates of 5 mV s<sup>-1</sup> of three concentrations of the composite material

| Catalysts                                                                    | Electrolyte (KOH) | Current density (mA cm <sup>-2</sup> ) | Overpotential (mV) | reference |
|------------------------------------------------------------------------------|-------------------|----------------------------------------|--------------------|-----------|
| <b>MTC@Co<sub>1-x</sub>Fe<sub>x</sub> S<sub>2</sub>-2</b>                    | 1 M               | 100                                    | 130                | This work |
| (Fe, Ni) <sub>9</sub> S <sub>8</sub> @SNC                                    | 1 M               | 10                                     | 207                | [1]       |
| Co <sub>8</sub> FeS <sub>8</sub> MXene / NF                                  | 1 M               | 10                                     | 170                | [2]       |
| (CoFe-MS/MOF                                                                 | 1 M               | 10                                     | 261                | [3]       |
| MoS <sub>2</sub> /CoFe@NC                                                    | 1 M               | 10                                     | 337                | [4]       |
| Se-(CoFe)S                                                                   | 1 M               | 10                                     | 281                | [5]       |
| NiCoOx                                                                       | 1 M               | 10                                     | 281                | [6]       |
| Co <sub>8</sub> FeS <sub>8</sub> @CoFe-MOF/NF                                | 1 M               | 10                                     | 213                | [7]       |
| CoS <sub>1.097</sub> /Fe <sub>1-x</sub> S/Ni <sub>3</sub> S <sub>2</sub> /NF | 1 M               | 50                                     | 229                | [8]       |

*Table S1: Comparison of OER performance of MTC@Co<sub>1-x</sub>Fe<sub>x</sub> S<sub>2</sub>-2 with some representative bimetallic sulfides OER electrocatalysts from literature.*

References:

1. Ma, Z., et al., *Construction of binary metal sulphides via lignosulfonate as sulphur source for efficient oxygen evolution reaction*. 2023. **48**(26): p. 9636-9646.
2. Li, M., et al., *Hierarchical electronic coupling engineering of bimetallic sulfide driven by CoFe bimetal MOFs anchored on MXene promotes efficient overall water splitting*. 2024. **358**: p. 130256.
3. Yu, R., et al., *Bimetallic sulfide particles incorporated in Fe/Co-based metal-organic framework ultrathin nanosheets toward boosted electrocatalysis of the oxygen evolution reaction*. 2022. **9**(13): p. 3130-3137.
4. Ma, W., et al., *N-doped carbon wrapped CoFe alloy nanoparticles with MoS<sub>2</sub> nanosheets as electrocatalyst for hydrogen and oxygen evolution reactions*. 2023. **48**(58): p. 22032-22043.
5. Song, Y., X. Zhao, and Z.-H.J.E.A. Liu, *Surface selenium doped hollow heterostructure/defects Co-Fe sulfide nanoboxes for enhancing oxygen*

- evolution reaction and supercapacitors*. 2021. **374**: p. 137962.
6. Xue, Y., et al., *Bimetallic hollow tubular NiCoO<sub>x</sub> as a bifunctional electrocatalyst for enhanced oxygen reduction and evolution reaction*. 2021. **13**(6): p. 7334-7342.
  7. Zhao, T., et al., *Constructing abundant phase interfaces of the sulfides/metal-organic frameworks pp heterojunction array for efficient overall water splitting and urea electrolysis*. 2023. **634**: p. 630-641.
  8. Wen, Y., et al., *Polymetallic sulfide nanosheet arrays with composite structure as a highly efficient oxygen evolution electrocatalyst*. 2023. **635**: p. 494-502.
